# Supplementary material
Source: publisher figshare collection journal article supplement (https://sage.figshare.com/ndownloader/files/20502648)
Supplement: Supplementary file 1 [file 20502648]

Supplementary Table 2: TIDieR checklist table

| Author                | Intervention groups                     | Training protocol at the start of the training program                                                          | Who provided the intervention (any specific training) | Mode of delivery and setting (format, setting) | Dose (no. of sessions, frequency, duration per session, duration of program) | Was the intervention personalised/ progressed, titrated or adapted                                                                                            | Any modification of intervention | Planned to assess adherence or fidelity | Extent to which intervention was delivered as planned                                                                                     |
|-----------------------|-----------------------------------------|-----------------------------------------------------------------------------------------------------------------|-------------------------------------------------------|------------------------------------------------|------------------------------------------------------------------------------|---------------------------------------------------------------------------------------------------------------------------------------------------------------|----------------------------------|-----------------------------------------|-------------------------------------------------------------------------------------------------------------------------------------------|
| <b>Mador 2009</b>     | Continuous training (cycle + treadmill) | Cycle at 50% Wmax on cycle ergometer. Treadmill exercise at a speed set at 80% of average speed during the 6MWT | Unclear                                               | Face to face in group setting, outpatient PR   | 24 sessions, 3x/week, unclear, 8 weeks                                       | When able to exercise for 20 minutes without intolerable dyspnea/ leg fatigue, cycle workload was increased by 10% and treadmill speed by 5-10%               | NR                               | NR                                      | Participants missed on average 2 out of 24 sessions (range, 0–7 sessions). Missed sessions were made up at the end of the 8-week program. |
|                       | Interval training (cycle + treadmill)   | 1 minute at 150% and 2 minutes at 75% of the cycle workload and treadmill speed estimated for continuous group  | Unclear                                               | Face to face in group, outpatient PR           | 24 sessions, 3x/week, unclear, 8 weeks                                       | When able to exercise for 21 minutes without intolerable dyspnea/ leg fatigue, cycle workload increased by 10% and treadmill speed was increased by 5% to 10% | NR                               | NR                                      |                                                                                                                                           |
| <b>Vogiatzis 2002</b> | Continuous (cycling)                    | 40 minutes cycling at an intensity equivalent to 50% of baseline PWR                                            | Physical therapist                                    | Face to face in group, outpatient PR           | 24 sessions, 2x/week, 40 min, 12 weeks                                       | Increased intensity monthly by 10% (i.e. 60% in second month, 70% in third month)                                                                             | NR                               | NR                                      | Attendance rate 88 +/- 4%                                                                                                                 |
|                       | Interval (cycling)                      | 30 second cycling at 100% baseline PWR, followed by                                                             | Physical therapist                                    | Face to face in group,                         | 24 sessions, 2x/week,                                                        | Increased intensity monthly by 20% (i.e. 120% in second month,                                                                                                | NR                               | NR                                      | Attendance rate 90 +/- 4%                                                                                                                 |

|                         |                                     |                                                                                                                                         |                               |                                                                   |                                                                                   |                                                                                                               |    |                                                                                |                                                |
|-------------------------|-------------------------------------|-----------------------------------------------------------------------------------------------------------------------------------------|-------------------------------|-------------------------------------------------------------------|-----------------------------------------------------------------------------------|---------------------------------------------------------------------------------------------------------------|----|--------------------------------------------------------------------------------|------------------------------------------------|
| <b>Puhan 2006</b>       | High intensity continuous (cycling) | 30 second rest (total 40 mins)<br>20 minutes of cycling at workload of 70% or more of maximum exercise capacity                         | Team of 12 physical therapist | outpatient PR<br>Face to face in group, in hospital in patient PR | 40min, 12 weeks<br>12-15 sessions, 5x/week, 20min, 3 weeks                        | 140% in third month)<br><br>Workload was the increased by 10% if the modified Borg rating was less than three | NR | Unintended breaks lasting more than 1 minute were recorder by physiotherapists | Adherence to planned exercise protocol = 24%   |
|                         | Interval (cycling)                  | 20 seconds at 50% of short-term maximal exercise capacity, followed by 40 seconds at 10% of short term maximal exercise (total 20 mins) | Team of 12 physical therapist | Face to face, group, in hospital                                  | 12-15 sessions, 5x/week, 20 min, 3 weeks                                          | Workload was the workload by 10% if the modified Borg rating was less than three                              | NR |                                                                                | Adherence to planned exercise protocol = 47.9% |
| <b>Lopez Lopez 2018</b> | cycling (cycling)                   | 30 minutes of pedalling on a cycle ergometer. (unclear intensity/workload)                                                              | Same investigator             | Face to face individual, hospital                                 | Unknown, 1x/day, 45 min session, different length of stay at hospital per patient | Cycling was modified based on participant fatigue and pulse oximetry readings                                 | NR | NR                                                                             | NR                                             |
|                         | calisthenic exercise (elastic band) | 30 minutes of lower-limb elastic band resistance exercises (unclear exercise movement/ target mm group)                                 | Same investigator             | Face to face individual, hospital                                 | Unknown, 1x/day, 45 min session, different length of stay at                      | Exercise was adapted to fatigue and dyspnea of patient                                                        | NR | NR                                                                             | NR                                             |

|                            |                                                                                                             |                                                                                                                                            |                                    |                                                             |                                                       |                                                                                                                                                                                                      |    |                                                                                           |          |
|----------------------------|-------------------------------------------------------------------------------------------------------------|--------------------------------------------------------------------------------------------------------------------------------------------|------------------------------------|-------------------------------------------------------------|-------------------------------------------------------|------------------------------------------------------------------------------------------------------------------------------------------------------------------------------------------------------|----|-------------------------------------------------------------------------------------------|----------|
|                            |                                                                                                             |                                                                                                                                            |                                    |                                                             | hospital<br>per patient                               |                                                                                                                                                                                                      |    |                                                                                           |          |
| <b>Dodia<br/>2012</b>      | LL Endurance<br>training<br>(treadmill)                                                                     | 20 minutes of<br>treadmill walking<br>according to ATS<br>guidelines                                                                       | Study<br>investigato<br>r          | Face to<br>face,<br>unclear,<br>hospital<br>outpatie<br>nts | 18<br>sessions,<br>3x/week,<br>20 mins, 6<br>weeks    | RPE maintained<br>between 12 and 14 on<br>Borg RPE and dyspnoea<br>rating of 3 on modified<br>Borg scale                                                                                             | NR | NR                                                                                        | NR       |
|                            | Unsupported<br>UL endurance<br>training<br>(weights)                                                        | Shoulder flexion<br>and lateral<br>shoulder abduction<br>with dumbbell<br>(3 sets of 30<br>repetitions)                                    | Study<br>investigato<br>r          | Face to<br>face,<br>unclear,<br>hospital<br>outpatie<br>nts | 18<br>sessions,<br>3x/week,<br>20 mins, 6<br>weeks    | Weight of dumbbell<br>periodically increased<br>by 0.5kg to maintain a<br>load that achieved a<br>rating of 12 to 14 on<br>Borg's scale of RPE and<br>a dyspnoea rating of 3<br>on the Borg's scale  | NR | NR                                                                                        | NR       |
| <b>Normandi<br/>n 2002</b> | high intensity,<br>lower<br>extremity<br>aerobic<br>endurance<br>conditioning<br>(treadmill +<br>cycle)     | 30 minutes of<br>training on<br>treadmill and bike<br>set at 80% max<br>achieved at<br>baseline<br>incremental<br>exercise testing         | Rehabilitati<br>on staff<br>member | Face to<br>face in<br>group,<br>outpatie<br>nt PR           | 16<br>sessions,<br>2x/week,<br>30-45 mins,<br>8 weeks | The exercise intensity<br>was adjusted based on<br>the subjects' Borg-scale<br>rated dyspnea and/or<br>leg fatigue or if the<br>heart rate approached<br>the maximum observed<br>in exercise testing | NR | Any<br>missed<br>sessions<br>made up<br>at end<br>of 8<br>week<br>program<br>to<br>ensure | NR       |
|                            | low intensity<br>peripheral<br>muscle<br>training<br>(repetition of<br>body weight +<br>weight<br>exercise) | A range of chair<br>exercises, standing<br>exercises, exercise<br>with weights and<br>sticks (8 to 10<br>repetitions for each<br>exercise) | Rehabilitati<br>on staff<br>ember  | Face to<br>face in<br>group,<br>outpatie<br>nt PR           | 16<br>sessions,<br>2x/week,<br>45 mins, 8<br>weeks    | No                                                                                                                                                                                                   | NR | all<br>subjects<br>complet<br>ed 16<br>sessions                                           | NR       |
| <b>Duruturk</b>            | Cycle exercise                                                                                              | 20-30 minutes of                                                                                                                           | Physical                           | Face to                                                     | 18                                                    | Exercise intensity                                                                                                                                                                                   | NR | NR                                                                                        | Attended |

|                       |                                                                                                |                                                                                                                                                           |                                                                        |                                                   |                                                                            |                                                                                                             |    |                                               |                                             |
|-----------------------|------------------------------------------------------------------------------------------------|-----------------------------------------------------------------------------------------------------------------------------------------------------------|------------------------------------------------------------------------|---------------------------------------------------|----------------------------------------------------------------------------|-------------------------------------------------------------------------------------------------------------|----|-----------------------------------------------|---------------------------------------------|
| <b>2016</b>           | (Cycling)                                                                                      | continuous cycling at 50-70% of the VO <sub>2</sub> max                                                                                                   | therapist                                                              | face, unclear, in physical therapy clinic         | sessions, 3x/week, each session between 20 and 45 min, 6 weeks             | adjusted based on modified Borg rated dyspnea or leg fatigue.                                               |    |                                               | on average 17 of 18 sessions (94% sessions) |
|                       | Calisthenic exercise training (body weight exercise in supine, side lying, chair and standing) | 16 rhythmical, calisthenic exercise including strength and stretching of the lower and upper extremity muscles (repeat exercises 10-15 times per session) | Physical therapist                                                     | Face to face, unclear, in physical therapy clinic | 18 sessions, 3x/week, each session between 20 and 45 min, 6 weeks          | Weeks 3 - 4 repeat exercises 15-20 times per session. Weeks 5 – 6 repeat exercises 25-30 times per session. | NR | NR                                            | attended 16 of the 18 (89%) sessions        |
| <b>McFarland 2012</b> | Aerobic exercise (walking / cycling exercise)                                                  | Supervised walking or restorator (cycling) exercise, or a combination of the two (goal 30 mins)                                                           | physical therapist and nurses, “everyone was trained in both protocol” | Face to face, individual, home                    | 20 physical therapy visits, 4 nursing visits, unclear, 8 week program      | Progressed up to 30 minutes at a pace tolerable for the patient                                             | NR | Recorded activities and time for each session | NR                                          |
|                       | Functional strengthening (e.g. sit to stand, heel raises)                                      | 12 to 18 trunk and multi-joint exercises including lower body strengthening exercises, resistance exercise with elastic bands/weights and                 | physical therapist and nurses, “everyone was trained in both protocol” | Face to face, individual, home                    | 16 physical therapy sessions + 8 nursing visits, unclear, unclear, 8 weeks | intensity was adjusted to patient capability and tolerance of exercise                                      | NR | Recorded resistance and number of reps        | NR                                          |

|                        |                                                               |                                                                                                                                                                                                                                                                                                                                                                    |                     |                                                     |                                                    |                                                                                                                                                                                                                                                                              |    |    |    |
|------------------------|---------------------------------------------------------------|--------------------------------------------------------------------------------------------------------------------------------------------------------------------------------------------------------------------------------------------------------------------------------------------------------------------------------------------------------------------|---------------------|-----------------------------------------------------|----------------------------------------------------|------------------------------------------------------------------------------------------------------------------------------------------------------------------------------------------------------------------------------------------------------------------------------|----|----|----|
|                        |                                                               | balance activities<br>(total 30 min)                                                                                                                                                                                                                                                                                                                               |                     |                                                     |                                                    |                                                                                                                                                                                                                                                                              |    |    |    |
| <b>Probst<br/>2011</b> | Low intensity<br>(crunches,<br>trunk rotation<br>and flexion) | 5 sets of exercise:<br>breathing<br>exercise(diaphragm<br>atic breathing and<br>pursed-lips<br>breathing);<br>strengthening of<br>the abdominal<br>muscles (crunches);<br>and calisthenics<br>(trunk rotation and<br>flexion, associated<br>with pursed lips<br>breathing<br>and prolonged<br>expiration). Each<br>set = 12 exercise,<br>repeated 15 times<br>each | physiother<br>apist | Face to<br>face,<br>group,<br>outpatie<br>nt clinic | 36<br>sessions,<br>3x/week,<br>60 min, 12<br>weeks | Every 7 sessions each<br>patient began a new<br>set of exercises.<br>Intensity was increased<br>in each new set of<br>exercises by a<br>progression in difficulty<br>regarding the execution<br>of the exercises: set 1<br>was the easiest, and set<br>5 the most difficult. | NR | NR | NR |
|                        | High intensity<br>and strength<br>(cycling +<br>treadmill)    | cycling ergometry<br>the training<br>intensity was<br>initially set at 60%<br>of the initial<br>maximum work<br>rate.<br>treadmill walking<br>the training<br>intensity was                                                                                                                                                                                        | physiother<br>apist | Face to<br>face,<br>group,<br>outpatie<br>nt clinic | 36<br>sessions,<br>3x/week,<br>60 min, 12<br>weeks | cycling ergometry the<br>training intensity was<br>initially set at 60% of<br>the initial maximum<br>work rate<br>treadmill walking the<br>training intensity was<br>initially set at 75% of<br>the average walking<br>speed during the                                      | NR | NR | NR |

|                    |                                                             |                                                                                                                                                                                                                       |                                                                                   |                              |                                      |                                                                                                                                                                                                                                                                                                                                                |    |    |    |
|--------------------|-------------------------------------------------------------|-----------------------------------------------------------------------------------------------------------------------------------------------------------------------------------------------------------------------|-----------------------------------------------------------------------------------|------------------------------|--------------------------------------|------------------------------------------------------------------------------------------------------------------------------------------------------------------------------------------------------------------------------------------------------------------------------------------------------------------------------------------------|----|----|----|
|                    |                                                             | initially set at 75% of the average walking speed during the baseline 6-min walk test. strength training (quadriceps, biceps and triceps) the training intensity was initially set at 70% of the baseline one-RM test |                                                                                   |                              |                                      | baseline 6-min walk test. strength training the training intensity was initially set at 70% of the baseline one-RM test. The physiotherapist increased the patient's work rate or duration every week, guided by a pre-determined schedule and driven by the patient's perception of symptoms (measured via Borg dyspnea and fatigue scoring). |    |    |    |
| <b>Ortega 2002</b> | Endurance (cycling)                                         | 40 minutes of cycling exercise at 70% peak work rate                                                                                                                                                                  | Group of chest physiotherapist, exercise physiologist, and respiratory physician) | Face to face, group, unclear | 36 sessions, 3x/week, 1 hr, 12 weeks | The work rate corresponding to 70% of the peak work rate achieved during the baseline incremental exercise test was selected as the target training intensity                                                                                                                                                                                  | NR | NR | NR |
|                    | Strength (weight lifting exercise with gymnastic apparatus) | 5 weight lifting exercises (chest pull, butterfly, neck press, leg flexion, leg extension) performed with gymnastic                                                                                                   | Group of chest physiotherapist, exercise physiologist, and                        | Face to face, group, unclear | 36 sessions, 3x/week, 1 hr, 12 weeks | strength-training program at a workload of 70 to 85% of the one RM. This test was repeated each 2 weeks for new adjustment of the workload                                                                                                                                                                                                     | NR | NR | NR |

|                       |                                                                |                                                                                                                                                                                                    |                                                                                                                                           |                                                 |                                                  |                                                                                                                                                                                                                                    |    |                                                                    |    |
|-----------------------|----------------------------------------------------------------|----------------------------------------------------------------------------------------------------------------------------------------------------------------------------------------------------|-------------------------------------------------------------------------------------------------------------------------------------------|-------------------------------------------------|--------------------------------------------------|------------------------------------------------------------------------------------------------------------------------------------------------------------------------------------------------------------------------------------|----|--------------------------------------------------------------------|----|
|                       | Combined<br>(weight lifting<br>+ cycling)                      | apparatus.<br>(4 sets, 6-8<br>repetition)<br>Five weight lifting<br>exercise (as in<br>strength group) (2<br>sets, 6-8 repetition)<br>AND<br>20 minutes of<br>cycling at 70% peak<br>work rate     | respiratory<br>physician<br><br>Group of<br>chest<br>physiother<br>apist,<br>exercise<br>physiologis<br>t and<br>respiratory<br>physician | Face to<br>face,<br>group,<br>unclear           | 36<br>sessions,<br>3x/week, 1<br>hr, 12<br>weeks | Initial cycle: 70% max.<br>Initial weights 70-85%<br>max                                                                                                                                                                           | NR | NR                                                                 | NR |
| <b>Mador<br/>2004</b> | Endurance<br>training<br>(cycling,<br>treadmill)               | Cycle at 50% of<br>maximal work<br>capacity.<br>Treadmills exercise<br>started at 1.1-2.0<br>miles per hour<br>based on 6MWT<br>results                                                            | unclear                                                                                                                                   | Face to<br>face,<br>group,<br>outpatie<br>nt PR | 24session,<br>3x/week,<br>unclear, 8<br>weeks    | Cycling workload<br>increased by 10% when<br>able to exercise for 20<br>minutes without<br>intolerable dyspnea.<br>Treadmill speed+/-<br>elevation increased<br>when able to exercise<br>for 15 min without<br>intolerable dyspnea | NR | missed<br>sessions<br>made up<br>at end<br>of 8<br>week<br>program | NR |
|                       | Endurance +<br>strength<br>(cycling,<br>treadmill,<br>weights) | Four strength<br>exercises (knee<br>flexion, knee<br>extension, seated<br>chest press,<br>combined<br>movement of<br>shoulder adduction<br>and elbow flexion)<br>(1 set of 10<br>repetition at 60% | unclear                                                                                                                                   | Face to<br>face,<br>group,<br>outpatie<br>nt PR | 24session,<br>3x/week,<br>unclear, 8<br>weeks    | Gradually increased<br>from 1 set to 3 sets of<br>10 repetitions, then<br>weight was increased<br>by 5 lb.                                                                                                                         | NR |                                                                    | NR |

|                                      |                                                                  |                                                                                                                                                                                                          |                                                                                                     |                                                     |                                                                                                                                                      |                                                                                                                                                                                    |    |    |                                  |
|--------------------------------------|------------------------------------------------------------------|----------------------------------------------------------------------------------------------------------------------------------------------------------------------------------------------------------|-----------------------------------------------------------------------------------------------------|-----------------------------------------------------|------------------------------------------------------------------------------------------------------------------------------------------------------|------------------------------------------------------------------------------------------------------------------------------------------------------------------------------------|----|----|----------------------------------|
|                                      |                                                                  | of their 1 RM)<br>AND<br>Endurance training<br>(same protocol as<br>other group)                                                                                                                         |                                                                                                     |                                                     |                                                                                                                                                      |                                                                                                                                                                                    |    |    |                                  |
| <b>Zambom<br/>Ferraresi<br/>2015</b> | Resistance<br>(resistance<br>machines)                           | Exercises for lower<br>limbs (leg press,<br>knee extension and<br>knee flexion) and<br>upper limbs (chest<br>press, seated row,<br>shoulder press).<br>(3-4 sets of 6-12<br>repetitions)                 | NR                                                                                                  | Face to<br>face,<br>group,<br>unclear               | 24<br>sessions,<br>2x/week,<br>90 min, 12<br>weeks                                                                                                   | Training loads were<br>50% - 70% one RM                                                                                                                                            | NR | NR | 96%<br>compliance<br>to training |
|                                      | Resistance +<br>endurance<br>(resistance<br>machine<br>+cycling) | Alternating<br>between resistance<br>and endurance<br>training.<br>20-35 minutes of<br>cycling at 40-85%<br>maximal aerobic<br>power.<br>AND<br>Resistance training<br>(same protocol as<br>other group) | NR                                                                                                  | Face to<br>face,<br>group,<br>unclear               | 24 session,<br>2x/week,<br>(one day<br>endurance,<br>one day<br>resistance)<br>90<br>mins(resist<br>ance), 20-<br>30 min<br>(endurance<br>, 12 weeks | Cycling training load at<br>40-85% maximal<br>aerobic power<br>Resistance training load<br>was 50% - 70% one RM                                                                    | NR | NR | 95%<br>compliance<br>to training |
| <b>Ramos<br/>2014</b>                | Resistance<br>training (with<br>elastic tubing)                  | Resistance<br>exercises for knee<br>extension and<br>flexion, shoulder<br>abduction and<br>flexion, and elbow<br>flexion were<br>performed using                                                         | Senior<br>physical<br>therapists<br>specialised<br>in PR +/-<br>musculoske<br>letal<br>rehabilitati | Face to<br>face,<br>group,<br>outpatie<br>nt clinic | 24<br>sessions,<br>3x/week,<br>60 min, 8<br>weeks                                                                                                    | Number of repetitions<br>per set based on results<br>of fatigue resistance<br>test<br>After four weeks of<br>training, the fatigue<br>resistance test was<br>repeated to determine | NR | NR | NR                               |



|                      |                                                           |                                                                                                                                                                                                                  |                                  |                                        |                                       |                                                                                                                                                                                                                                                                             |    |    |                                            |
|----------------------|-----------------------------------------------------------|------------------------------------------------------------------------------------------------------------------------------------------------------------------------------------------------------------------|----------------------------------|----------------------------------------|---------------------------------------|-----------------------------------------------------------------------------------------------------------------------------------------------------------------------------------------------------------------------------------------------------------------------------|----|----|--------------------------------------------|
|                      |                                                           | elastic tubing (2 - 7 sets, each set consisted of the number of repetitions achieved during 20 seconds of the fatigue resistance test)                                                                           | on and four physical therapists  |                                        |                                       | new number of repetitions for second half of program                                                                                                                                                                                                                        |    |    |                                            |
|                      | Conventional resistance training (with weight machine)    | Resistance exercises for knee extension and flexion, shoulder abduction and flexion, and elbow flexion were performed using weight machines (three sets of 10 repetitions)                                       |                                  | Face to face, group, outpatient clinic | 24 sessions, 3x/week, 60min, 8 week   | The conventional group started at 60% of their one-RM. The load was increased by 4% every four sessions until they reached 80% of their initial 1-RM at the end of the protocol                                                                                             | NR | NR | NR                                         |
| <b>McNamara 2013</b> | Water based exercise (walking, leg cycling, UL endurance) | exercised in a hospital hydrotherapy pool 8 min warm up (punching and kicking), 20 min lower limb endurance (stationary and travelling, jogging), 3 min rest, 15 min lower limb endurance (seated on floatation) | same experienced physiotherapist | Face to face, group, hospital          | 36 sessions, 3x/week, 60 min, 8 weeks | choose the most comfortable level of water immersion in the standing position to perform the majority of exercises, which was always between the xiphisternum and the clavicles for each participant; encouraged to exercise at an intensity rating of three to five on the | NR | NR | Attended mean of 21 (2) sessions out of 24 |

|                   |                                                        |                                                                                                                                                                                                                                                                                                                                        |                                        |                               |                                       |                                                                                |    |    |                                            |
|-------------------|--------------------------------------------------------|----------------------------------------------------------------------------------------------------------------------------------------------------------------------------------------------------------------------------------------------------------------------------------------------------------------------------------------|----------------------------------------|-------------------------------|---------------------------------------|--------------------------------------------------------------------------------|----|----|--------------------------------------------|
|                   |                                                        | device, cycling, kicking, jumping), 2 min rest, 10 min upper limb endurance (with plastic bottle or foam dumbbells 3x 10 rep), 2 min cool down                                                                                                                                                                                         |                                        |                               |                                       | modified Borg scale for dyspnoea and perceived exertion                        |    |    |                                            |
|                   | Land based exercise (walking, cycling + UL endurance ) | Exercised in a temperature-controlled hospital gymnasium 8 min warm up (punching, kicking), 20 min lower limb endurance (walking on ground/treadmill), 3 min rest, 15 min lower limb endurance (cycling on stationary or dual action bike), 2 min rest, 10 min upper limb endurance (hand held dumb bells, 3x 10 rep), 2 min cool down | same experience d physiotherapist      | Face to face, group, hospital | 36 sessions, 3x/week, 60 min, 8 weeks | walked at an intensity of 80% of the average 6MWT speed                        | NR | NR | Attended mean of 19 (4) out of 24 sessions |
| <b>Klijn 2013</b> | Endurance and progressive resistance training (EPR)    | Leg press, leg extension, pull down and chest press (2 sets of 8-                                                                                                                                                                                                                                                                      | Exercise therapist (physical education | Face to face, group, hospital | 30 sessions, 3x weekly, Each          | Resistance training progress to 3 sets with load increasing to 60-80% of 1 RM) | NR | NR | 81.5% (9.7%) attendance rate               |

|                                                                                                            |                                                                                                                                                                                                                                                                                                                                                                                                                                                                               |                                                                                                                                                                                                                       |                               |                                                              |                                                                                                                                                                                                                                                                                                                                                                                                                                                                                                                                                                                                                                                                    |    |    |                             |
|------------------------------------------------------------------------------------------------------------|-------------------------------------------------------------------------------------------------------------------------------------------------------------------------------------------------------------------------------------------------------------------------------------------------------------------------------------------------------------------------------------------------------------------------------------------------------------------------------|-----------------------------------------------------------------------------------------------------------------------------------------------------------------------------------------------------------------------|-------------------------------|--------------------------------------------------------------|--------------------------------------------------------------------------------------------------------------------------------------------------------------------------------------------------------------------------------------------------------------------------------------------------------------------------------------------------------------------------------------------------------------------------------------------------------------------------------------------------------------------------------------------------------------------------------------------------------------------------------------------------------------------|----|----|-----------------------------|
|                                                                                                            | 10 repetitions at 50% of 1 RM)                                                                                                                                                                                                                                                                                                                                                                                                                                                | teachers) and 8 Cesar practice therapists (Training sessions were twice weekly supervised by a clinical 9 exercise physiologist (PK) to ensure that all essential program characteristics were strictly 10 enforced.) | Face to face, group, hospital | 30 sessions, 3x weekly, Each session 45-90 minutes, 10 weeks | <p>session 45-90 minutes, 10 weeks</p> <p>Treadmill walking – increased with aim to reach 15 mins with 75% 6MWT at week 10</p> <p>Cycling progressed to 24 minutes at 75% maximum work rate</p> <p>Exercise intensity was increased when dyspnea Borg scores were less than 5.</p> <p>After the first two to three training sessions, adding anaerobic high intensity cycle exercise (3-5 sets of 2-3 minutes cycling at 65-70% maximum work rate and increase leg press to more than 20 repetitions.</p> <p>Aerobic cycling – increase to 2-3 sets of 6-8 minutes</p> <p>Anaerobic 2-3 series 5 minute</p> <p>Resistance training – increase repletion volume</p> | NR | NR | 82.7 (8.2%) attendance rate |
| nonlinear periodized exercise program (cycling, weight machines) (varies intensity and volume per session) | <p>10 minutes of treadmill walking at 50% of average speed from 6MWT</p> <p>10 minutes of cycling at 30% of maximum work rate</p> <p>Aerobic cycling (2 sets of 3-5 minute of cycling at 50-60% maximum work rate) and resistance exercise (as above 2 set of 12-15 repetitions at 40-50% of 1 RM)</p> <p>Aerobic cycle training with combined with high volume and very low intensity resistance training and anaerobic cycling with low-volume, moderate high intensity</p> |                                                                                                                                                                                                                       |                               |                                                              |                                                                                                                                                                                                                                                                                                                                                                                                                                                                                                                                                                                                                                                                    |    |    |                             |

| resistance training     |                                                                                |                                                                                                                                                                                     |                 |                                         |                                        |                                                                                                                                                                                                                  |    |    |    |
|-------------------------|--------------------------------------------------------------------------------|-------------------------------------------------------------------------------------------------------------------------------------------------------------------------------------|-----------------|-----------------------------------------|----------------------------------------|------------------------------------------------------------------------------------------------------------------------------------------------------------------------------------------------------------------|----|----|----|
| <b>Holland<br/>2004</b> | unsupported upper limb endurance training (unsupported UL exercise with stick) | Consisted of five upper limb exercises performed in a sitting position with a 500-g stick until each exercise could be performed for 3 minutes                                      | physiotherapist | Face to face, group, hospital           | 12 sessions, 2x/week, unclear, 6 weeks | The weight then was increased by 0.5-kg increments to maintain a load that achieved a perceived exertion rating of 12 to 14 on the Borg scale <sup>13</sup> and a dyspnea rating of 3 on the modified Borg scale | NR | NR | NR |
|                         | control group (supported UL training with Purdue pegboard test)                | Four timed tasks in which as many pins as possible are placed on a pegboard within a defined time, in a sitting position with the arms supported on the table                       | physiotherapist | Face to face, group, hospital           | 12 sessions, 2x/week, unclear, 6 weeks | NR                                                                                                                                                                                                               | NR | NR | NR |
| <b>Mkacher<br/>2015</b> | PR only (supervised exercise training)                                         | inpatient PR, which included (1) supervised exercise training twice per day, 3 times a week, (2) daily breathing exercises, and (3) self-management education and psychological and | Unclear         | Face to face, group, hospital inpatient | Unclear                                | NR                                                                                                                                                                                                               | NR | NR | NR |

|                                                                   |                                                                                                                                                                                                                                                                                     |                     |                               |                                        |                                                                                                                                                                                                                                                                                                 |    |    |    |
|-------------------------------------------------------------------|-------------------------------------------------------------------------------------------------------------------------------------------------------------------------------------------------------------------------------------------------------------------------------------|---------------------|-------------------------------|----------------------------------------|-------------------------------------------------------------------------------------------------------------------------------------------------------------------------------------------------------------------------------------------------------------------------------------------------|----|----|----|
| PR + balance (stance, transition, gait, functional strengthening) | social support<br>Inpatient PR program, swapped balance training with one of the supervised exercise training three times a week<br>Balance training consisted of 4 main types of exercise: (1) stance exercises, (2) transition exercises, (3) gait exercises, and (4) functional. | Health professional | Face to face, group, hospital | 72 sessions, 3x/week, 30 min, 24 weeks | When a participant was able to complete a task independently and with little instability, the difficulty level was increased progressively by introducing more challenging conditions (e.g., eyes closed, addition of a secondary cognitive task, increased speed/repetition, or perturbations) | NR | NR | NR |
|-------------------------------------------------------------------|-------------------------------------------------------------------------------------------------------------------------------------------------------------------------------------------------------------------------------------------------------------------------------------|---------------------|-------------------------------|----------------------------------------|-------------------------------------------------------------------------------------------------------------------------------------------------------------------------------------------------------------------------------------------------------------------------------------------------|----|----|----|

TIDieR: Template for Intervention Description and Replication checklist; Wmax: maximal work capacity; 6MWT: 6 Minute Walk Test; PR: Pulmonary Rehabilitation; PWR: Peak Work Rate; RPE: Rate of Perceived Exertion; NR: Not Reported; ATS: American Thoracic Society; LL: Lower Limb; UL: Upper Limb; VO<sub>2</sub>max: maximal oxygen uptake; RM: Repetition Maximum
